# 1 **SmartRNASeqCaller: improving germline variant calling from RNAseq**

2 Mattia Bosio <sup>1,2</sup>, Alfonso Valencia <sup>1,2,3</sup>, Salvador Capella-Gutierrez <sup>1,2,\*</sup>

3

4 1: Barcelona Supercomputing Center (BSC), C/Jordi Girona 29, 08034, Barcelona, Spain

5 3: Spanish National Bioinformatics Institute (INB), ELIXIR-ES.

6 3: ICREA, Pg. Lluís Companys 23, 08010, Barcelona, Spain

7 \* Corresponding author, mail : salvador.capella@bsc.es

8

## 9 **Abstract**

### 10 **Background:**

11 Transcriptomics data, often referred as RNA-Seq, are increasingly being adopted in  
12 clinical practice due to the opportunity to answer several questions with the same data -  
13 e.g. gene expression, splicing, allele-specific expression even without matching DNA.  
14 Indeed, recent studies showed how RNA-Seq can contribute to decipher the impact of  
15 germline variants. These efforts allowed to dramatically improved the diagnostic yield in  
16 specific rare disease patient cohorts. Nevertheless, RNA-Seq is not routinely adopted for  
17 germline variant calling in the clinic. This is mostly due to a combination of technical noise  
18 and biological processes that affect the reliability of results, and are difficult to reduce  
19 using standard filtering strategies.

20

### 21 **Results:**

22 To provide reliable germline variant calling from RNA-Seq for clinical use, such as for  
23 mendelian diseases diagnosis,, we developed SmartRNASeqCaller: a Machine Learning  
24 system focused to reduce the burden of false positive calls from RNA-Seq. Thanks to the  
25 availability of large amount of high quality data, we could comprehensively train  
26 SmartRNASeqCaller using a suitable features set to characterize each potential variant.

27 The model integrates information from multiple sources, capturing variant-specific  
28 characteristics, contextual information, and external sources of annotation. We tested our  
29 tool against state-of-the-art workflows on a set of 376 independent validation samples  
30 from GIAB, Neuromics, and GTEx consortia. SmartRNASeqCaller remarkably increases  
31 precision of RNA-Seq germline variant calls, reducing the false positive burden by 50%  
32 without strong impact on sensitivity. This translates to an average precision increase of  
33 20.9%, showing a consistent effect on samples from different origins and characteristics.

34

### 35 **Conclusions:**

36 SmartRNASeqCaller shows that a general strategy adopted in different areas of applied  
37 machine learning can be exploited to improve variant calling. Switching from a naïve  
38 hard-filtering schema to a more powerful, data-driven solution enabled a qualitative and  
39 quantitative improvement in terms of precision/recall performances. This is key for the  
40 intended use of SmartRNASeqCaller within clinical settings to identify disease-causing  
41 variants.

### 42 **Keywords:**

43 RNA-Sequencing, variant calling, machine learning, transcriptomics

44

### 45 **Background**

46 Being able to associate genomic variation to phenotypic traits is a long-lasting question  
47 and fundamental task for omics data analysis. Massive adoption of next sequencing  
48 technologies enabled the discovery of causal links between genetic variants and  
49 phenotypes. This is especially true for monogenic mendelian diseases (1,2) and in most  
50 of cancer studies (3–5). On one side, NGS data have been used to elucidate the genetic

51 origin of many diseases, with successful diagnoses in 41% of cases overall. On the other  
52 side, hundreds of cancer driver genes, and thousands of putative cancer-driver mutations  
53 have been identified using NGS with important consequences for diagnosis and  
54 treatment.

55 Whole-genome sequencing (WGS) and whole-exome sequencing (WES) are commonly  
56 adopted both in multicenter studies with thousands of patients (6–8), and increasingly in  
57 clinical daily practice (2,9–11). In parallel, initiatives like GTEx (8) showed how RNA-Seq  
58 data enriched the picture of genome-phenome relationships, for example defining tissue-  
59 specific expression and eQTLs. The potential to answer multiple questions  
60 simultaneously from RNA-Seq e.g. gene expression, splicing detection, allele specific  
61 expression (12–15), jointly with its reduced costs, convinced an increasingly large share  
62 of scientists to adopt RNA-Seq in their analyses.

63 Using RNA-Seq to call germline variants can be beneficial in clinical settings, for example  
64 for Mendelian and common diseases studies. While RNA-Seq does not require additional  
65 laboratory experiments if data are already collected, it can enhance the information from  
66 samples without matching DNA (16,17). Indeed, it has been shown to significantly  
67 improve the diagnostic yield for Rare Diseases (18) when used jointly with DNA data, and  
68 thoroughly processed by field-experts. These recent results show an opportunity to  
69 develop tools to automatically enhance the information that can be extracted from an ever  
70 growing number of RNA-Seq samples. Such tools need to deal with a whole set of  
71 technical challenges i.e. split read mapping, alternative splicing, RNA-Edit, RNA  
72 polymerase errors during transcription, and allele specific expression (12,15,16) hindering  
73 the reliability of RNA-Seq variant calls. A fundamental step for a broader RNA-Seq  
74 adoption in clinical settings for variant discovery and prioritization is to reduce the burden  
75 of false positive calls. A number of workflows have been developed to reliably call and  
76 filter germline variants from RNA-Seq including SNPiR, Opossum or eSNV-detect

77 (16,19,20). Those workflows rely on a set of hard-filtering rules implying a trade-off  
78 between quality and quantity of called variants. Such filtering schemas have a limited  
79 ability to capture complex patterns, and to discriminate true germline calls from the rest.  
80 In this work, we developed SmartRNASeqCaller, a machine-learning module to  
81 accurately predict germline variants from RNA-Seq. It makes use of a Random Forest  
82 (RF) model that integrates intrinsic variant features with external annotations.  
83 SmartRNASeqCaller then generates a data-driven nonlinear predictor for germline  
84 variants, harnessing the power to detect complex feature relationship from a massive  
85 high-quality training dataset. With SmartRNASeqCaller we aim to improve existing state-  
86 of-the-art in discriminating true germline variants from the rest by adopting a more  
87 powerful and integrative approach than the hard-filtering strategy used in most of the  
88 existing workflows. The overall objective is to minimize the burden of false positive calls  
89 from RNA-Seq to call variants with comparable reliability to WGS/WES results. Similar to  
90 other biomedical research fields where machine learning techniques are used (21,22), the  
91 main novelty of our approach relies on learning complex patterns to discriminate if a given  
92 call is a true germline variant.

93 SmartRNASeqCaller can be applied as a standalone module to refine the results from  
94 previous variant calling workflows without requiring a full sample re-analysis. In this work,  
95 we provide SmartRNASeqCaller as a plugin to the GATK best-practices workflow. This  
96 module can be easily integrated into any variant calling workflow, as long as it provides  
97 an aligned BAM file, and a VCF file with the variants to be classified.

98 In order to compare the performance of this newly proposed module, we benchmarked  
99 the impact of including SmartRNASeqCaller as an additional step after using the GATK  
100 best practices workflow against only using the GATK workflow and against SNPiR. We  
101 analysed a set of 10 independent high-quality samples from Neuroinformatics consortium (23),  
102 as well as on GIAB sample NA12878 (24). We then compared SmartRNASeqCaller

103 impact when applied to the resulting variants from the GATK best practices pipeline on  
104 365 samples from GTEx consortium, collected from 5 tissues from 73 donors. These  
105 independent tests serve to confirm the utility of the method in improving germline variant  
106 call precision for clinical applications through specific real use-cases.

## 107 **Implementation**

108 We have implemented an effective tool to post-process variant calling results from RNA-  
109 Seq to reliably identify germline variants. This tool is designed to be used as an additional  
110 step in conventional variant calling workflows. It integrates ideas and resources from the  
111 literature (12,13,19,25) within a machine learning framework. The driving approach is to  
112 use Random Forest (RF), a machine learning technique, to generate a model that is able  
113 to discriminate true germline variants from the rest. This process is possible by identifying  
114 complex patterns based on variants annotated features coming from multiple sources.

115 SmartRNASeqCaller is divided in two main steps. First, each variant is annotated with a  
116 set of 20 features (table 1). Seven out of them are intrinsic properties including variant  
117 type and length, as well as contextual features including external annotations such as the  
118 variant in a RepMask region from the UCSC annotation (26), and whether it is annotated  
119 into a RNA-Edit site from (25,27). In parallel, the caller specific features include GATK  
120 specific quality values, as well as others such as BaseQRankSum, MQRankSum and  
121 ClippingScore. Second, each variant is processed by a classifier that estimates the  
122 likelihood of being a true germline variant e.g. appearing in the genomic DNA.  
123 Importantly, this classifier model has been generated using a RF approximation, trained  
124 on a set of high-quality matched samples of WGS and RNA-Seq with more than 600'000  
125 variants.

## 126 **Samples for the study**

127 To train and validate our tool, we processed samples from three high-quality independent  
128 datasets. First, we use 20 samples from Neuromics consortium with high-quality  
129 matching DNA sequencing data, specifically WGS from blood samples, and RNA-Seq  
130 obtained from skin fibroblast biopsies. For this work purposes, we considered the DNA  
131 variant calling results as our reference set of ground truth variants against which measure  
132 the RNA-Seq workflows results. This dataset was split into 10 samples for training and 10  
133 for validation guaranteeing the independence of both subsets as we are interested in the  
134 general applicability of the model for identifying true germline variants. Second, we  
135 analyzed sample NA12878 from the Genome in a Bottle (GIAB) consortium (24).  
136 Specifically, we used RNA-Seq reads from SRR1153470 sample and as gold-standard  
137 the set of high-confidence SNPs, small indels, and homozygous reference calls  
138 associated to GIAB sample NA12878. Third, we used data from 365 GTEx tissue-  
139 samples from 73 donors with matching whole blood WGS callsets from GTEx v7  
140 consortium (35). We limited our scope to 5 tissues per donor: Whole blood, Sun Exposed  
141 Skin, Adipose Subcutaneous tissue, Skeletal Muscle, and Fibroblasts. We chose these  
142 tissues because they represent the most common tissues collected and/or derived in the  
143 clinical practice. They are relatively easy to acquire from patients in routine biopsies, and  
144 present different expression profiles and transcriptome complexities (28), representing a  
145 good testbed for the most common scenarios in which SmartRNASeqCaller could be  
146 applied.

## 147 **Baseline variant calling workflow**

148 Prior to the application of SmartRNASeqCaller, we processed RNA-Seq from GIAB and  
149 Neuromics with GATK RNA-Seq best practices workflow, available at this repository  
150 [[https://github.com/inab/RDConnect\\_RNASeq](https://github.com/inab/RDConnect_RNASeq)]. This workflow produces two files i) an

151 aligned BAM file, which is obtained with the STAR v2.35a aligner and uses GATK 3.6.0  
152 for subsequent processing steps (24), and ii) a VCF file with the initial set of candidate  
153 variants that will be used as input for SmartRNASeqCaller.

154 GTEX samples were already aligned with TopHat 1.4, thus we used the provided BAM file  
155 as input for the variant calling workflow. This difference in the original alignment step  
156 represents an opportunity to evaluate the SmartRNASeqCaller performance on data  
157 generated following an alternative approach to the one used to train this classifier.

### 158 **SmartRNASeqCaller training**

159 We used 665,178 called variants from 10 matched DNA and RNA-Seq samples from the  
160 Neuromics Consortium as our training set. The training dataset size allows to build a  
161 model for discriminating true germline variants from the rest using a Random Forest (RF)  
162 algorithm with sufficient data to reduce potential overfitting to the training set. We chose  
163 to use a RF-based algorithm considering the available number of variants in the training  
164 set and the need to detect complex patterns without a predefined structure. Other  
165 methods like deep learning require at least a spatial data-structure for building a model.  
166 Moreover, RF automatically deals with different data types e.g. binaries, qualitative and  
167 quantitative, without requiring prior normalization step, and it is robust to class  
168 imbalancing (27,38). Conversely, Support Vector Machine (SVM) and others classical  
169 regression models tend to be more sensitive to the classes unbalanced and, in addition,  
170 their performances depend on data normalization strategies (38). Finally, a key aspect for  
171 choosing RF over other potential options is the robustness of this approximation to over-  
172 fitting since we want the model to have consistent performances on novel samples.

173 An initial set of 20 features, generic and GATK specific, were analyzed for training the  
174 model (table 1). We employed a recursive feature elimination strategy with 10 fold cross  
175 validation applied on the training variants set (as shown in Figure 1A) to select the best

176 feature set for classification. Analysing the results in Figure 1A, we chose 11 features,  
177 given that the overall trade-off among average accuracy, accuracy variance, and  
178 overfitting potential of the model. With only 11 features, the overall model accuracy is  
179 close to the maximum, is quite compact, and is able to generate robust predictions.  
180 Importantly, all excluded features fall very close to some selected feature in the tSNE plot  
181 in Figure 1B, suggesting that the information content from the excluded features are  
182 already provided by other features in the model. The model features, together with the  
183 excluded ones are listed in Table 1. We used the R (version 3.5.1) modules RangeR and  
184 caret for the model training and evaluation.

185 The selected 11 features are a collection of heterogeneous variant descriptions (Figure  
186 1B and Table 1). It includes intrinsic variant properties as well contextual ones including  
187 GATK specific features, the later give an assessment of the trustworthiness of the variant  
188 call (table 1). We also included variants annotation from external datasets and genomic  
189 context e.g. variant overlapping with an homopolymeric stretch of 5bp or more, variant  
190 overlapping with the 4bp intronic region of exon-intron junctions, variant annotated as  
191 RNA-Edit events from (16,34). These external annotations, as remarked in (22), are flags  
192 useful to keep or discard a called variant. For instance, SNPiR implemented a series of  
193 hard-filtering rules based on those annotations in a subsequent funneling process,  
194 progressively reducing the number of potential false positive SNPs in their call set at the  
195 cost of strongly reducing the overall number of called variants.

## 196 **Model validation**

197 After training the RF model, we tested its predictive performance against 3 other  
198 alternative workflows on 10 skin fibroblasts samples from Neuromics, and on sample  
199 NA12878. Specifically, we evaluated its predictive performance in terms of precision and  
200 recall against the ground truth constituted by genomic high-quality variant calls. Those



201 are the four considered alternatives, including SmartRNAseqCaller.

202

203 - GATK Best practices recommendations for calling RNA-Seq variants.

204 - GATK Best practices recommendations plus SmartRNASeqCaller to validate  
205 whether the model refines the initial RNA-Seq called variants.

206 - SNPiR, which is able to provide reliable calls for SNPs without being limited to  
207 somatic variant detection.

208 - SNPiR-like hard filtering. In this alternative we assess the potential of simple  
209 filtering scheme using annotated features for the model. In this workflow we  
210 discarded all variants with an annotation of RNA-Edit, homopolymeric region,  
211 repmask region, or intron-exon junction. This should serve as a proxy to  
212 understand the impact of following a more sophisticated RNA-Seq variant calling  
213 approximation. Importantly, this approximation sets the baseline of the performed  
214 analysis.

215

216 Moreover, we processed 365 samples from GTEx consortium evaluating the impact of  
217 including SmartRNASeqCaller on top of GATK best practices workflow. We used the  
218 Analysis Freeze WGS variant calls that have been used in GTEx for eQTL and Allele  
219 Specific Expression analyses (35) as true reference set. We measured the performances  
220 by precision and recall, analyzing the effect both on the bulk of samples and tissue-wise  
221 in order to highlight potential biases due to SmartRNASeqCalled being trained on  
222 fibroblast samples.

223 Following commonly accepted practices from genomic data analysis, we focused on  
224 regions covered by at least 8 reads. We chose this threshold as it should allow reliable  
225 identification for heterozygous genotypes with sufficient sensitivity (22). All samples have  
226 been processed using the human reference genome hs37d5 (37).

## 227 **Code availability and execution requirements**

228 SmartRNASeqcaller is available at <https://github.com/inab/SmartRNASeqCaller>. It can be  
229 downloaded and executed as a shell script with specific parameters to change its default  
230 behaviour, and/or using software containers e.g. dockers, inside a nextflow workflow (29).  
231 We expect to guarantee full analysis reproducibility following recommendations around  
232 Open Science, Open Data and Open Source. An average run of SmartRNASeqCaller  
233 with Nextflow implementation takes 46 minutes, using less than 4 GB RAM with 4 CPUs  
234 in parallel.

## 235 **Results**

236 Our first goal was to train a reliable model to classify true germline variants using RNA-  
237 Seq. Then we validated using three different independent datasets against three  
238 commonly used workflows. As demonstrated below, SmartRNASeqCaller would enable  
239 the use of RNA-Seq variant calling in the clinic practice by reducing the burden of false  
240 positive calls.

### 241 **SmartRNASeqcaller obtains better precision/recall results than state-of-the-art** 242 **workflows on fibroblast samples**

243 We proceeded to measure the SmartRNASeqCaller performance on variants from 10  
244 independent samples from the same Neuromics cohort used for training. We used  
245 SmartRNASeqCaller as predictor for all variants considering called variants using WGS  
246 as the gold standard. Following broadly adopted practices (19,19,30), we evaluated  
247 single nucleotide variants in regions with a minimum coverage of 8 or more RNA-Seq  
248 reads to reduce the impact of wrong calls due to the effect of random noise on low-  
249 coverage areas.

250 We report the precision/recall results for the all available samples (10 for training set and

251 10 for validation set) in Figure 2. In the case of SmartRNASeqCaller we reported  
252 separately the performance for the training and validation data sets to assess the model  
253 robustness and identify potential signs of overfitting.

254 First, the GATK Best practices workflow has an overall good performance in terms of  
255 average precision ( $82.9\% \pm 3.9\%$ ) and recall ( $78.7\% \pm 1.4\%$ ). Second, the GATK  
256 workflow has a better performance than SNPiR for the whole data set when considering  
257 average precision and recall with F1 measure (GATK: 0.81 vs SNPiR: 0.66 From Table  
258 2). Third, when comparing the performance on the training and validation samples for  
259 SmartRNASeqCaller we can observe that the model is robust to overfitting. The average  
260 performance on the training set, albeit better, is not drastically different when compared to  
261 the validation samples. Focusing on differential changes with respect to the baseline  
262 established by the GATK best practices workflow (Suppl fig. 1), the overall impact of  
263 SmartRNASeqCaller brings significant improvements in precision (on average +9% for  
264 the validation set) with a modest tradeoff in recall (on average -0.9% for the validation  
265 set). This pattern is observed consistently among training and validation samples. Finally,  
266 when compared to naïve hard-filtering strategies, we can appreciate that the average  
267 precision is marginally improved but the average recall drastically drops, showing how  
268 naïve approaches end-up doing more harm than good. These results support the idea of  
269 integrating complex patterns derived from different sources, rather than limiting to simpler  
270 intersection or union operations, using strategies based on machine learning techniques

### 271 **SmartRNASeqCaller improves precision on sample NA1278**

272 As a further evaluation step to study the model generalization and to exclude specific  
273 biases from the considered samples, we tested SmartRNASeqCaller on the publicly  
274 available sample NA12878 from the GIAB Consortium. On one hand, we processed raw  
275 RNA-Seq reads through the GATK best practices variant calling workflow to have a

276 baseline calls set. Building on this set we applied SmartRNASeq as an additional step to  
277 the GATK Best practices called variants for comparison against it, against SNPiR, and  
278 against a naïve hard-filtering strategy. We used GIAB calls from DNA sequencing as the  
279 ground truth to evaluate the RNA-Seq variant calling results.

280 Similarly to the previous analysis, in Figure 2B we reported the performance in terms of  
281 precision/recall obtained for SmartRNASeqCaller and other alternative approaches.  
282 Similar results to the previously analysed 20 samples were obtained confirming the  
283 general usability of our model. Importantly, the baseline established by the GATK best  
284 practices workflow yielded better results than SNPiR. This brings in the discussion the  
285 impact of previous steps e.g. choice of the alignment strategy as well as the impact of the  
286 continuous improvement of external annotation sources.

287 Similarly to comparison for the Neuromics samples, the application of  
288 SmartRNASeqCaller to the baseline results allows to significantly improve precision (8%)  
289 with a moderate trade-off in recall (~2%) achieving the best overall results, while the  
290 naïve hard-filtering strategy confirms to be the worst performing algorithm due to its  
291 drastic effect on the final recall of variants. The baseline values of precision/recall for  
292 NA12878 are worse than the average values with Neuromics samples as absolute  
293 values. Nevertheless, the change brought by SmartRNASeqCaller is robust and in the  
294 same direction, showing how the model behaves consistently across different initial  
295 conditions.

### 296 **SmartRNASeqCaller is robust to both tissue-of-origin differences, and alignment** 297 **algorithm**

298 We then assessed SmartRNASeqCaller performance on a large independent cohort from  
299 365 GTEx (8) samples with matching WGS data. We chose tissue from 5 tissues that  
300 represent most biopsies in clinical settings: Whole Blood, Skin Sun Exposed, Adipose

301 Subcutaneous, Skeletal Muscle, and Fibroblasts. These tissues have diverse  
302 transcriptome complexity and may be a closer representation of datasets used for clinical  
303 applications.

304 GTEx v7 data have been aligned using TopHat v1.4, rather than STAR v3.5.1, which we  
305 used to align the training set for SmartRNASeqCaller. Thanks to this, we could test how  
306 robust SmartRNASeqCaller is to alternative upstream workflows, as aligners present  
307 systematic differences between them. This is a particularly challenging dataset since  
308 TopHat 1.4 has been shown to have many limitations and artifacts when compared to  
309 recent aligners like STAR or Hisat2 (12,31).

310 In Figure 3A, precision/recall results comparing the performance of the baseline  
311 TopHat+GATK workflow and SmartRNASeqCaller applied as an additional step to the  
312 baseline TopHat+GATK workflow are presented. The overall effect of strong precision  
313 improvement with small sensitivity loss observed in Figure 2 is maintained on GTEx data.  
314 Indeed, SmartRNASeqCaller improves precision on average by 20.9%, a 6.25 fold  
315 greater than the reduction in recall (3.2%).

316 In Figure 3B, we present the precision values separated by tissue and workflow. The  
317 median precision values for the TopHat+GATK workflow strongly depend on the tissue of  
318 origin, ranging from 61.4% for Whole Blood, to 73.9% for Skeletal Muscle. After the  
319 application of SmartRNASeqCaller, the precision levels range increase and are more  
320 compact ranging from 85.6% in Whole Blood to 89.1% in Skeletal Muscle samples,  
321 reducing dramatically (~50%) the differences between tissues. Similarly to Figure 3B, we  
322 present in Figure 3C recall values for tissue of origin and workflow. SmartRNASeqCaller  
323 effect is stable across tissues, reducing the sensitivity on average by 3.2% while keeping  
324 the average recall between 85%-90% for all analyzed tissues. This is important because  
325 we are able to capture much more true germline variants with higher precision than the  
326 standard baseline.

327

328 In general terms, SmartRNASeqCaller strongly improves the overall precision of RNA-  
329 Seq variant calling with a small cost of sensitivity, even for data generated with different  
330 aligners and collected from different tissues in the body demonstrating its general  
331 applicability.

## 332 **Discussion**

333 In this work we developed SmartRNASeqCaller, a random forest model to reliably  
334 discriminate true germline variants from the rest using RNA-Seq. SmartRNASeqCaller  
335 combines intrinsic variant characteristics, with external annotation sources in a unique  
336 model able to reduce the burden of false positive calls from RNA-Seq.

337 We trained our model using more than 600'000 variants from 10 high-quality samples  
338 with matching WGS data from Neuromics Consortium. We then validated it against a  
339 dataset of 10 independent samples from the same cohort, as well as on an independent  
340 validation set composed by the broadly used sample NA12878 from the GIAB Consortium  
341 (24), and by 365 samples from GTEx consortium (8). In all cases, applying  
342 SmartRNASeqCaller significantly reduced the number of false positive calls almost  
343 halving the number, without hindering recall e.g. average 0.9% loss in recall for the  
344 validation samples from GIAB and Neuromics, and 3.2% on GTEx samples.  
345 SmartRNASeqCaller allowed to achieve the best precision/recall performance when  
346 compared against state-of-the-art workflows e.g. GATK best practices variant calling  
347 workflow and SNPiR (16).

348 A whole set of technical challenges for the wide adoption of RNA-Seq as a source of data  
349 for germline variant calling have been described in the literature i.e. split read mapping,  
350 alternative splicing, RNA-Edit, RNA polymerase errors during transcription, and allele  
351 specific expression (12,15,16). Several tools have now been released to address these

352 task-specific challenges. Examples are tools such as STAR and Histat2 (17,18), which  
353 aim to improve read alignment; or REDITools and DeepRed, which are tools to detect  
354 RNA Editing events (19,20). Resources like REDIPortal and RADAR (25,27) collect  
355 regions with evidence of RNA-Edit activity along the human genome and are a valuable  
356 resource to spot potential false positive calls.

357 However, few workflows have been developed to reliably call and filter germline  
358 mutations from RNA-Seq. Those developed though rely on a set of hard-filtering rules  
359 implying a trade-off between quality and quantity of selected variants. Some examples  
360 are eSNV-detect (21), SNPiR (12), and Opossum (22). eSNV-detect (21) combines  
361 multiple aligners to reduce aligner-specific errors prior to the variant calling itself. Once  
362 this step is completed, eSNV-detect calls variants using SAMtools (32). However, this  
363 practice introduces significant computational costs and questions their use in routinary  
364 analysis. SNPiR (12) uses BWA-aln (23) to map spliced reads combined with GATK  
365 UnifiedGenotyper (24) to generate an initial set of variant calls, which are then filtered  
366 using external annotations about variant characteristics e.g. RNA-Edit site, homopolymer  
367 region, repmask site. This filtering allows to improve precision at the cost of reduced  
368 sensitivity. Opossum (22) employs a different strategy by preprocessing and filtering  
369 RNA-Seq raw data to make it suitable for haplotype-based variant calling with Platypus  
370 (25). This strategy renders remarkable results, albeit limited to the easily aligned portion  
371 of the genome. Moreover, *a priori* exclusion of all sites prone to RNA-Edit, which include  
372 many true germline variant e.g. 25% of RNA-Edit positions in RADAR and REDI-Portal  
373 databases are located in exonic areas overlap with documented DNA mutations in  
374 GnomAD dataset (26), may limit the use of Opossum into routine clinical practice.

375 Methods evaluation in most of these works is not standardized and is heavily dependent  
376 on the annotations used to determine the scope of analysis e.g. gene definitions,  
377 inclusion or exclusion of specific regions/SNP type, publicly available gold standard

378 dataset, etc. There is therefore a need to joint efforts in the community to standardize  
379 those efforts including the definition of relevant datasets and metrics.

380 The main driver to develop SmartRNASeqCaller was to obtain the highest reliability for  
381 variants called from RNA-Seq experiments for its use in routine clinical practice. For this  
382 we focused on improving the precision of the generated variant calls. We first chose to  
383 integrate heterogeneous and non-redundant variants features to generate a rich and  
384 complex description of each variant. Tools like SNPiR use a similar approach to apply  
385 simple filters to exclude variants if characterized by unreliable features, which improved  
386 precision compared to baseline. However, a simple filtering strategy is unable to properly  
387 exploit the potential of a rich and complex multidimensional space. It can generate a  
388 strong tradeoff between precision and sensitivity that can be detrimental for tasks such as  
389 diagnosis. For that, we chose to train a Random Forest classifier on more than 600'000  
390 variants from 10 samples. We chose Random Forests because it has been previously  
391 applied in complex scenarios with many training samples, producing remarkable results in  
392 terms of precision and robustness including DNA variant calling (21). We then evaluated  
393 SmartRNASeqCaller following standard practices of processing independent samples  
394 from different studies to ensure the general usability of this model across a wide variety of  
395 samples from different tissues, and different upstream alternative workflows to generate  
396 the initial calls sets.

397 Here we show that switching from a naïve hard-filtering schema to a more powerful, data-  
398 driven solution enabled a qualitative and quantitative improvement in terms of  
399 precision/recall. When compared to a SNPiR-like strategies of filtering all variants  
400 annotated by some unreliable characteristic, the drastic reduction in recall does not  
401 compensate for the improvement in terms of precision. This effect is mostly due to the  
402 improvement and expansion of available annotations since the SNPiR publication, as well  
403 as to the quality filtering already implemented in the baseline workflow that removes



404 plenty of unreliable variants from RNA-Seq.

405 SmartRNASeqCaller builds on existing literature for variant calling using RNA-Seq,  
406 improving overall performances and trustworthiness of the obtained results. Nevertheless,  
407 as noted in (16,24), its discovery potential is inherently limited by the nature of RNA-Seq  
408 experimental set-ups: there is no hope to detect variants in areas of the genome that are  
409 not expressed. Similarly, tissue-specific gene expression can limit the discovery of  
410 phenotypic-causing variants as many experiment tend to use easily accessible tissues  
411 rather than the affected one. Those accessible tissues might not express the genes of  
412 interest for dissecting the genetic causes of the observed phenotype. However, recent  
413 results showed that it is possible to obtain reliable mutation profile data of not easy-to-  
414 reach tissues from other accessible tissues by generating suitable reprogrammed cells  
415 (18). How RNA-Seq data is obtained can also directly affect the sensitivity of our method  
416 as nonsense variants can be missed as a result of the nonsense-mediated decay  
417 mechanisms (33).

418 Despite these factors limiting the scope of potential discoveries from RNA-Seq, they can  
419 simultaneously be turned into a powerful filter against noise. Provided that the sequenced  
420 tissue is relevant for the studied disease, RNA-Seq variants can limit the focus to those  
421 genes that actually are being used by the affected cells, as well as inferring if there are  
422 “missing genes” e.g. genes that are normally expressed in the tissue that are not present  
423 in the experiment when considering reference datasets.

424 An additional factor contributing towards the divergence between RNA-Seq variants and  
425 variants extracted from DNA is the existence of genes in which only one parental allele is  
426 expressed (16,34). Previous work in this direction suggests that only 5% – 10% of human  
427 genes are subject to monoallelic gene expression (34), which could account for up to half  
428 of the missing recall in our results. Strategies to improve the overall recall will require then  
429 restructuring baseline variant calling workflows, specifically about the calling and filtering

430 criteria

431 Although SmartRNASeqCaller allows to drastically reduce false positives from the  
432 analyzed data, similarly to other tools e.g. SNPiR, and approximations, our model may  
433 miss to filter variants due to systematic errors in the preceding workflows. Different  
434 strategies have been proposed to overcome those systematic errors including merging  
435 results from multiple samples to exclude novel recurrent rare variants (34). However, we  
436 believe that with a much wider and diverse training dataset, the occurrence of systematic  
437 errors can be strongly reduced. Moreover, our model can easily incorporate extra  
438 features that may characterize systematic errors e.g. DNA sequence surrounding each  
439 variant, in future developments.

440 A go-to RNA-Seq reliable variant calling workflow like SmartRNASeqCaller can help  
441 filtering out genomic variants that may look promising from DNA data analysis but are  
442 either not expressed in the tissue of interest, or removed by post-transcriptional  
443 modifications, reducing the burden of false positive calls and enhancing the diagnosis  
444 potential of these analyses.

445 Importantly, an additional benefit of reliable RNA-Seq variant calling would allow to detect  
446 post-transcriptional RNA-specific variants that are not present at genomic level but could  
447 have functional effects by themselves and/or jointly with nearby genomic variants.  
448 Accurate variant calling results can help investigating if RNA-Edit, generally not  
449 considered as source of disease, may act detrimentally towards the cell. It is theoretically  
450 possible to detect RNA-Edit events acting like germline variants for further annotation and  
451 interpretation for disease generation (35).

452

## 453 **Conclusions**

454 Despite the limitations of calling genomic variants from RNA-Seq, our work demonstrates  
455 improvements in the field of RNA-Seq variant calling to detect germline variants with high

456 precision and recall using appropriate machine learning tools.

457 SmartRNASeqCaller can be a go-to tool for reliable variant calling from RNA-Seq, with  
458 the potential to enhance diagnostic yield and have better disease characterization in the  
459 tissue of interest. SmartRNASeqCaller allows to harness information from RNA-Seq and  
460 to generate a very precise calls set with good sensitivity. These characteristics are of  
461 paramount importance in clinical settings and can provide relevant benefits. RNA-Seq  
462 can be used to integrate DNA mutation information with tissue specific results providing  
463 an independent source of information to filter and validate disease-causing candidate  
464 variants.

465 Furthermore it can palliate the absence of genomic data for specific samples, presenting  
466 a viable way to extract a reliable variant calls, and generate a new knowledge base of  
467 RNA mutations. This could allow RNA-Seq samples processing for tissues cohorts in  
468 clinic to extract a very precise and context-specific mutational landscape without requiring  
469 additional DNA sequencing.

470 Finally, SmartRNASeqCaller can be used as an additional step of any existing variant  
471 calling workflow. This makes possible to even reanalyze existing cohorts with the goal of  
472 detecting germline variations without requiring expensive computation.

## 473 **Declarations**

### 474 **Ethics approval and consent to participate**

475 Not applicable. All samples processed in this work come from consortia in which the  
476 consent has been explicitly granted for research purposes.

### 477 **Consent for publication**

478 Not applicable

479 **Availability of data and material**

480 **Project name:** SmartRNASeqCaller

481 **Project home page:** <https://github.com/inab/SmartRNASeqCaller>

482 **Operating system(s):** Platform independent

483 **Programming language:** Python, Bash, Nextflow, R

484 **Other requirements:** GATK 3.6-0, Samtools, Bcftools, Bedtools,tabix,Python 2.7:

485 (pysam, pandas), R 3.5.0 (caret, ranger). Optional: Docker

486 **License:** GNU GPLv3

487

488 **Datasets availability:**

489 - GIAB NA12878 data are available at : <https://jimb.stanford.edu/giab-resources>

490 - Neuromics cohort: The data that support the findings of this study are available  
491 from Neuromics consortium but restrictions apply to the availability of these data,  
492 which were used under license for the current study, and so are not publicly  
493 available. Data are however available from the authors upon reasonable request  
494 and with permission of Neuromics consortium. [https://rd-neuromics.eu/project-](https://rd-neuromics.eu/project-welcome/)  
495 [welcome/](https://rd-neuromics.eu/project-welcome/)

496 - GTEx data: The data that support the findings of this study are available from  
497 GTEx Consortium but restrictions apply to the availability of these data, which were  
498 used under license for the current study, and so are not publicly available. Data  
499 are however available from the authors upon reasonable request and with  
500 permission of GTEx consortium. <https://gtexportal.org/home/datasets>

501 **List of abbreviations:**

502 **RF:** Random Forest

503 **WES:** Whole Exome Sequencing

504 **WGS:** Whole Genome Sequencing

505 **GATK:** Genome Analysis ToolKit

506 **GIAB :** Genome In a Bottle

507 **GTEx :** Genotype Tissue Expression

#### 508 **Competing interests**

509 The authors declare that they have no competing interests

#### 510 **Funding**

511 RD-Connect has been established thanks to the funding from the European Community's  
512 Seventh Framework Program (FP7) under grant agreement number 305444 "RD-  
513 CONNECT: An integrated platform connecting registries, biobanks and clinical  
514 bioinformatics for rare disease research. The Central Node at the Barcelona  
515 Supercomputing Center (BSC) is a member of the Spanish National Bioinformatics  
516 Institute (INB), ISCIII-Bioinformatics platform and is supported by grant PT17/0009/0001,  
517 of the Acción Estratégica en Salud 2013-2016 of the Programa Estatal de Investigación  
518 Orientada a los Retos de la Sociedad, funded by the Instituto de Salud Carlos III (ISCIII)  
519 and European Regional Development Fund (ERDF). This work was funded by ELIXIR,  
520 the research infrastructure for life-science data.

#### 521 **Authors' contributions**

522 **M.B:** Designed the algorithm, performed training and validation of the data, write the first  
523 version of the manuscript. **A.V:** Designed the algorithm and validation strategy, **S.C.G**  
524 Designed the algorithm and validation strategy, write the final version of the manuscript.  
525 All authors read and approved the final manuscript.

## 526 Acknowledgements

527 We are grateful to Ana Topf and Steve Laurie for facilitating the access to the data from  
528 the Neuromics project. We also thank insightful comments over preliminary versions of  
529 this work to Marta Melé and Jennifer Harrow.

## 530 FIGURES

531 **Figure 1: Random forest model construction and iterative feature selection.**

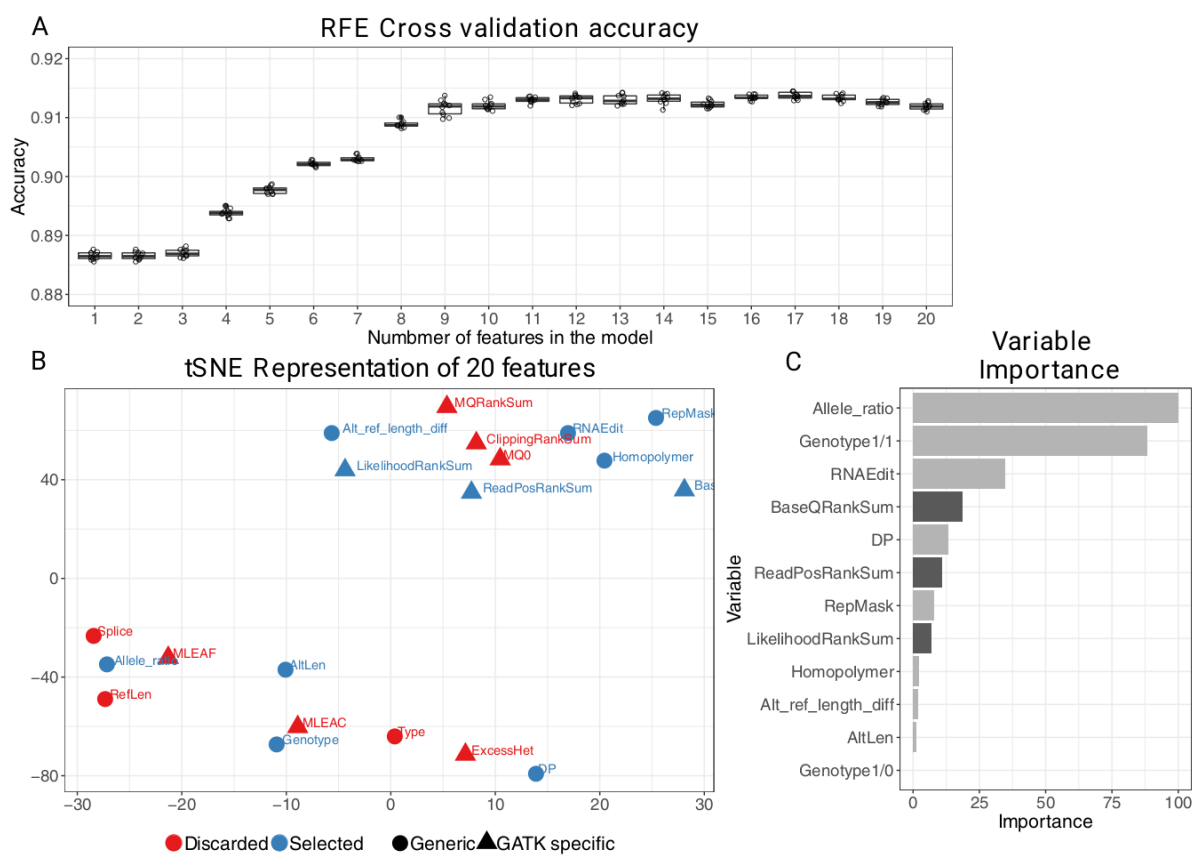

532

533 A) Training performances for recursive feature elimination process. From 11 features on  
534 there is no apparent benefit in terms of classification accuracy.

535 B) tSNE representation of the 20 features studied using the training data set. Features  
536 are color and shape coded to reflect if they are part of the final model, and if they are  
537 generic e.g. intrinsic and contextual properties, or GATK specific. All excluded features

538 are very close to at least one selected one, suggesting that their information content was  
539 redundant.

540 C) Variant importance for the prediction model. Light gray darks represent generic  
541 annotations, Darker grey bars represent GATK specific annotations.

542

543 **Figure 2: Precision/Recall results on Neuromics and NA12878 GIAB samples**

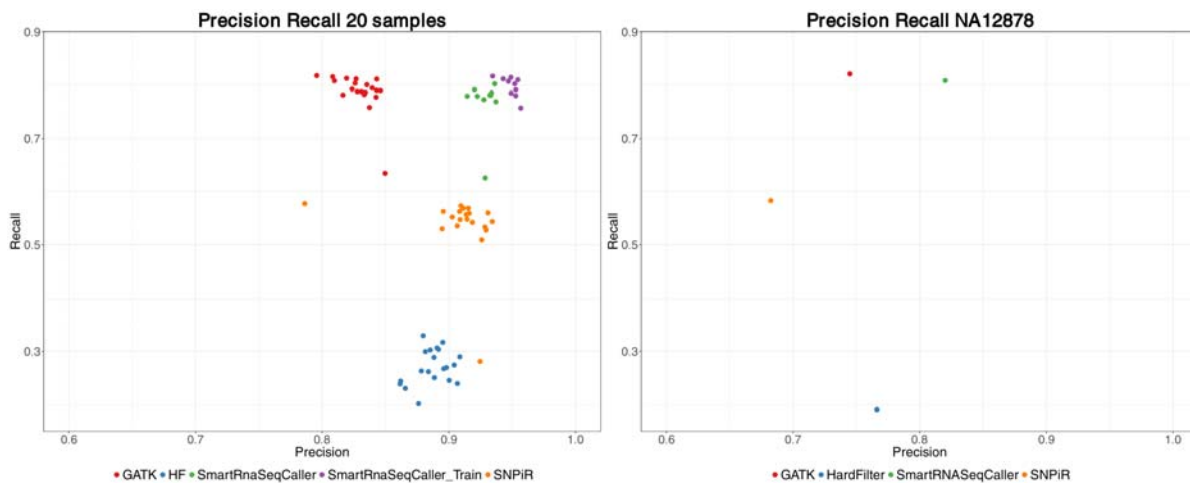

544

545 A) Precision/recall results analysing two separated sets of 10 samples each from the  
546 same cohort from the Neuromics consortium, which are available at the RD-Connect  
547 platform. It compares the SmartRNASeqCaller application against the baseline **GATK**  
548 Best practices variant calling workflow, against an alternative naive filtering method  
549 depicted as **Hard Filtering**, and against **SNPIR**. We report the results for the training and  
550 validation samples for SmartRNASeqCaller separately to show that there is not sign of  
551 overfitting to the model. Moreover, we can observe how the strong improvement of  
552 precision at a moderate loss of recall behavior is conserved for the validation set of  
553 samples, which have not been used at all for generating the Random Forest model As  
554 expected, the precision/recall values for the samples in the training set are better than for  
555 the validation samples, but the overall effect is similar and robust on the 10 validation  
556 samples. Indeed, for the training data set SmartRNASeqCaller achieves +12.0%

557 precision, and 0.1% less recall while that for the validation data set it obtains a +9.3%  
558 precision and 0.9% less recall compared to the GATK best practices workflow  
559 (supplementary figure 1).

560 B) Precision/recall results after analysing sample NA12878. It compares  
561 SmartRNASeqCaller against the baseline GATK best practices variant calling workflow,  
562 against an alternative naive filtering method depicted as **Hard Filtering**, and against  
563 “SNPiR”. We can observe how the strong improvement of precision at a moderate loss of  
564 recall behavior is conserved in this independent sample as well. Here too, the overall  
565 relationships among method are conserved, confirming the results previously obtained on  
566 the 20 samples from the Neuromics Consortium.

567 **Figure 3: Precision/Recall on 365 GTEx samples**



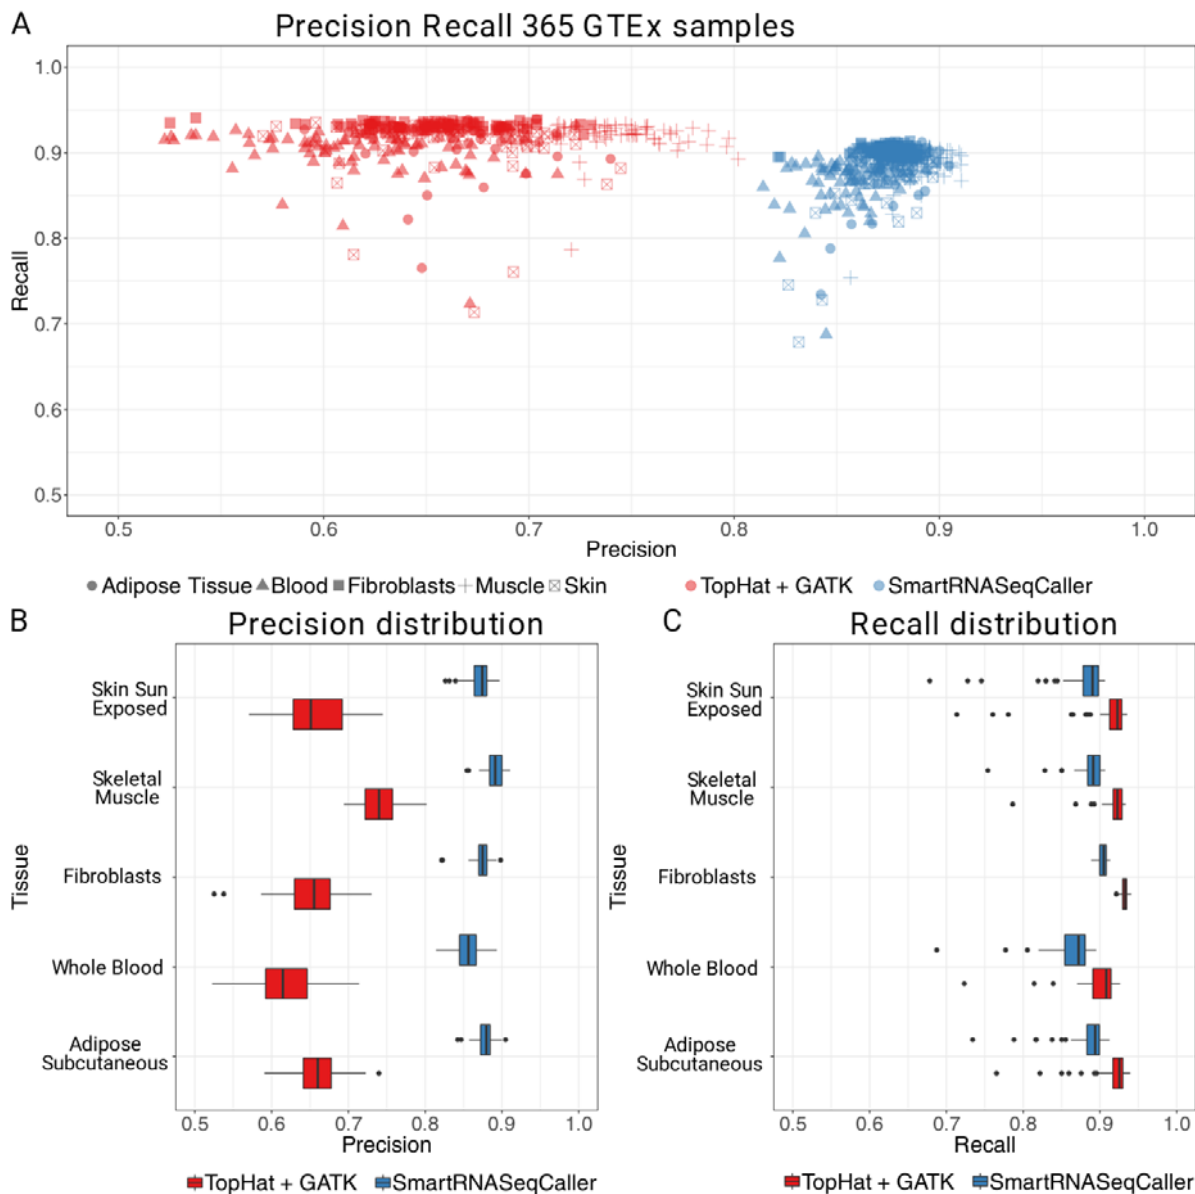

568

569 A) Precision/recall results analysing 365 tissue samples from GTEX cohort. Samples are  
 570 from five different tissues and 73 patients. Precision/recall plot comparing TopHat+GATK  
 571 Best practices variant calling workflow against SmartRNASeqCaller applied on  
 572 TopHat+GATK results. SmartRNASeqCaller shows a strong effect improving precision on  
 573 average by 20.9%, reducing Recall by 3.2% on average.

574 B) Boxplots comparing precision values for GATK best practices and  
 575 SmartRNASeqCaller. We observe how samples from different tissues have different  
 576 burden of false positives in GATK. After SmartRNASeqCaller application the differences

577 are less evident and the boxplots overlap across tissues. C) Boxplots comparing Recall  
 578 values for GATK best practices and SmarRNASeqCaller. On average, the application of  
 579 SmartRNASeqCaller reduces recall by 3.2%. The impact of SmartRNASeqCaller is to  
 580 increase the overall precision, levelling the performance across tissues close to 90%,  
 581 simultaneously keeping high levels of Recall (between 85 and 90%).

## 582 Tables

583 **Table 1. Features considered to train the random forest model.**

|                             | <b>Name</b>  | <b>Selected?</b> | <b>Extra information</b>                                |
|-----------------------------|--------------|------------------|---------------------------------------------------------|
| <b>Intrinsic properties</b> | Allele ratio | Yes              | Alternative allele percentage                           |
|                             | Alt Len      | Yes              | Length of the alternative allele                        |
|                             | Genotype     | Yes              | Heterozygous or homozygous call                         |
|                             | DP           | Yes              | Depth of coverage                                       |
|                             | Ref-Alt Len  | Yes              | Length difference of alternative and reference alleles  |
|                             | RefLen       | No               | Length of reference allele                              |
|                             | Type         | No               | SNP / Indel                                             |
| <b>Contextual features</b>  | RNA-Edit     | Yes              | Annotated as RNA-Edit event in databases                |
|                             | RepMask      | Yes              | Included in RepeatMasker track from UCSC Genome Browser |

|                                  |                   |     |                                                                                                                                                              |
|----------------------------------|-------------------|-----|--------------------------------------------------------------------------------------------------------------------------------------------------------------|
|                                  | Homopolymer       | Yes | Is the variant within a homopolymeric region of genome (5 bases or more)                                                                                     |
|                                  | SpliceSite        | No  | Is the variant within 4 nucleotide distances from an exon-intron junction                                                                                    |
| <b>GATK-specific Annotations</b> | BaseQRankSum      | Yes | Compares the base qualities of the data supporting the reference allele with those supporting any alternate allele.                                          |
|                                  | ReadPosRankSum    | Yes | Tests whether there is evidence of bias in the position of alleles within the reads that support them, between the reference and alternate alleles.          |
|                                  | LikelihoodRankSum | Yes | Compares the likelihood of reads to their best haplotype match, between reads that support the reference allele and those that support the alternate allele. |
|                                  | ClippingRankSum   | No  | Tests whether the data supporting the reference allele shows more or less base clipping (hard clips) than those supporting the alternate allele.             |
|                                  | ExcessHet         | No  | Estimates excess heterozygosity in a                                                                                                                         |

|  |           |    |                                                                                                                         |
|--|-----------|----|-------------------------------------------------------------------------------------------------------------------------|
|  |           |    | population of samples                                                                                                   |
|  | MLEAF     | No | Maximum likelihood expectation (MLE) for the allele frequency for each ALT allele                                       |
|  | MLEAC     | No | Maximum likelihood expectation (MLE) for the allele counts for each ALT allele                                          |
|  | MQ0       | No | Count of all reads that have MAPQ = 0, it can be used for quality control;                                              |
|  | MQRankSum | No | Compares the mapping qualities of the reads supporting the reference allele with those supporting the alternate allele. |

584 This table contains a brief description of all features, as well as if they have been selected  
 585 for the final SmartRNASeqCaller model. Features are split by type, and the selected ones  
 586 are sorted by the relevant importance for the prediction model, as from Figure 1C.

587

588

589 **Table 2: Summary of F1 statistic on Neuromics samples**

| F1 measure | Hard Filtering | GATK | SmartRNASeqCaller Train | SmartRNASeqCaller Test | SNPiR |
|------------|----------------|------|-------------------------|------------------------|-------|
| Mean       | 0.41           | 0.81 | 0.87                    | 0.84                   | 0.66  |

|                    |      |      |      |      |      |
|--------------------|------|------|------|------|------|
| Median             | 0.41 | 0.81 | 0.87 | 0.85 | 0.68 |
| Standard Deviation | 0.04 | 0.02 | 0.01 | 0.03 | 0.08 |
| Minimum            | 0.33 | 0.73 | 0.85 | 0.75 | 0.43 |
| Maximum            | 0.48 | 0.83 | 0.88 | 0.86 | 0.70 |

590 F1 measure(geometric mean of precision and recall on 20 samples from a cohort from  
591 the Neuromics Consortium. From this summary statistic we can infer how the baseline  
592 GATK variant calling workflow achieves better results than the simple hard filtering  
593 strategy, and the SNPiR algorithm as well. The application of SmartRNASeqCaller to the  
594 GATK best practices workflow, allows to further improve the F1 results. We split train and  
595 validation values for SmartRNASeqCaller, to avoid bias of the training samples on the  
596 overall result.

## 597 **References**

- 598 1. Clark MM, Stark Z, Farnaes L, Tan TY, White SM, Dimmock D, et al. Meta-analysis  
599 of the diagnostic and clinical utility of genome and exome sequencing and  
600 chromosomal microarray in children with suspected genetic diseases. *Npj Genomic*  
601 *Med.* 2018 Jul 9;3(1):16.
- 602 2. Nguyen MT, Charlebois K. The clinical utility of whole-exome sequencing in the  
603 context of rare diseases - the changing tides of medical practice. *Clin Genet.* 2015  
604 Oct;88(4):313–9.
- 605 3. Rau A, Flister M, Rui H, Auer PL. Exploring drivers of gene expression in the Cancer  
606 Genome Atlas. *Bioinformatics.* 2019 Jan 1;35(1):62–8.
- 607 4. Thorsson V, Gibbs DL, Brown SD, Wolf D, Bortone DS, Ou Yang T-H, et al. The  
608 Immune Landscape of Cancer. *Immunity.* 2018 17;48(4):812-830.e14.
- 609 5. Bailey MH, Tokheim C, Porta-Pardo E, Sengupta S, Bertrand D, Weerasinghe A, et  
610 al. Comprehensive Characterization of Cancer Driver Genes and Mutations. *Cell.*  
611 2018 Apr 5;173(2):371-385.e18.
- 612 6. The 1000 Genomes Project Consortium. A global reference for human genetic  
613 variation. *Nature.* 2015 Oct;526(7571):68–74.
- 614 7. The UK10K project identifies rare variants in health and disease. *Nature.* 2015 Oct  
615 1;526(7571):82–90.
- 616 8. The Genotype-Tissue Expression (GTEx) project | *Nature Genetics* [Internet]. [cited  
617 2018 Dec 3]. Available from: <https://www.nature.com/articles/ng.2653>
- 618 9. Zawati MH, Parry D, Thorogood A, Nguyen MT, Boycott KM, Rosenblatt D, et al.  
619 Reporting results from whole-genome and whole-exome sequencing in clinical  
620 practice: a proposal for Canada? *J Med Genet.* 2014 Jan;51(1):68–70.
- 621 10. Bosio M, Drechsel O, Rahman R, Muyas F, Rabionet R, Bezdan D, et al. eDiVA—  
622 Classification and prioritization of pathogenic variants for clinical diagnostics. *Hum*

- 623 Mutat [Internet]. 2019 [cited 2019 May 29];0(0). Available from:  
624 <https://onlinelibrary.wiley.com/doi/abs/10.1002/humu.23772>
- 625 11. Byron SA, Van Keuren-Jensen KR, Engelthaler DM, Carpten JD, Craig DW.  
626 Translating RNA sequencing into clinical diagnostics: opportunities and challenges.  
627 Nat Rev Genet. 2016 May;17(5):257–71.
- 628 12. Sahraeian SME, Mohiyuddin M, Sebra R, Tilgner H, Afshar PT, Au KF, et al. Gaining  
629 comprehensive biological insight into the transcriptome by performing a broad-  
630 spectrum RNA-seq analysis. Nat Commun. 2017 05;8(1):59.
- 631 13. Xu C. A review of somatic single nucleotide variant calling algorithms for next-  
632 generation sequencing data. Comput Struct Biotechnol J. 2018 Jan 1;16:15–24.
- 633 14. Conesa A, Madrigal P, Tarazona S, Gomez-Cabrero D, Cervera A, McPherson A, et  
634 al. A survey of best practices for RNA-seq data analysis. Genome Biol [Internet].  
635 2016 [cited 2018 Dec 3];17. Available from:  
636 <https://www.ncbi.nlm.nih.gov/pmc/articles/PMC4728800/>
- 637 15. Han Y, Gao S, Muegge K, Zhang W, Zhou B. Advanced Applications of RNA  
638 Sequencing and Challenges. Bioinforma Biol Insights. 2015 Nov 15;9(Suppl 1):29–  
639 46.
- 640 16. Piskol R, Ramaswami G, Li JB. Reliable Identification of Genomic Variants from  
641 RNA-Seq Data. Am J Hum Genet. 2013 Oct 3;93(4):641–51.
- 642 17. Cummings BB, Marshall JL, Tukiainen T, Lek M, Donkervoort S, Foley AR, et al.  
643 Improving genetic diagnosis in Mendelian disease with transcriptome sequencing.  
644 Sci Transl Med. 2017 19;9(386).
- 645 18. Gonorazky HD, Naumenko S, Ramani AK, Nelakuditi V, Mashouri P, Wang P, et al.  
646 Expanding the Boundaries of RNA Sequencing as a Diagnostic Tool for Rare  
647 Mendelian Disease. Am J Hum Genet. 2019 Mar 7;104(3):466–83.
- 648 19. Oikkonen L, Lise S. Making the most of RNA-seq: Pre-processing sequencing data

- 649 with Opossum for reliable SNP variant detection. Wellcome Open Res [Internet].  
650 2017 Mar 17 [cited 2018 Dec 3];2. Available from:  
651 <https://www.ncbi.nlm.nih.gov/pmc/articles/PMC5322827/>
- 652 20. Tang X, Baheti S, Shameer K, Thompson KJ, Wills Q, Niu N, et al. The eSNV-detect:  
653 a computational system to identify expressed single nucleotide variants from  
654 transcriptome sequencing data. *Nucleic Acids Res.* 2014 Dec 16;42(22):e172.
- 655 21. Ho DSW, Schierding W, Wake M, Saffery R, O'Sullivan J. Machine Learning SNP  
656 Based Prediction for Precision Medicine. *Front Genet* [Internet]. 2019 [cited 2019  
657 May 29];10. Available from:  
658 <https://www.frontiersin.org/articles/10.3389/fgene.2019.00267/full>
- 659 22. Triantafyllidis AK, Tsanas A. Applications of Machine Learning in Real-Life Digital  
660 Health Interventions: Review of the Literature. *J Med Internet Res.*  
661 2019;21(4):e12286.
- 662 23. Lochmüller H, Badowska DM, Thompson R, Knoers NV, Aartsma-Rus A, Gut I, et al.  
663 RD-Connect, NeurOmics and EURenOmics: collaborative European initiative for rare  
664 diseases. *Eur J Hum Genet.* 2018 Jun;26(6):778.
- 665 24. Zook JM, Chapman B, Wang J, Mittelman D, Hofmann O, Hide W, et al. Integrating  
666 human sequence data sets provides a resource of benchmark SNP and indel  
667 genotype calls. *Nat Biotechnol.* 2014 Mar;32(3):246–51.
- 668 25. Picardi E, D'Erchia AM, Lo Giudice C, Pesole G. REDportal: a comprehensive  
669 database of A-to-I RNA editing events in humans. *Nucleic Acids Res.* 2017  
670 04;45(D1):D750–7.
- 671 26. Karolchik D, Hinrichs AS, Furey TS, Roskin KM, Sugnet CW, Haussler D, et al. The  
672 UCSC Table Browser data retrieval tool. *Nucleic Acids Res.* 2004 Jan  
673 1;32(Database issue):D493-496.
- 674 27. Ramaswami G, Li JB. RADAR: a rigorously annotated database of A-to-I RNA



- 675 editing. *Nucleic Acids Res.* 2014 Jan 1;42(D1):D109–13.
- 676 28. Melé M, Ferreira PG, Reverter F, DeLuca DS, Monlong J, Sammeth M, et al. The  
677 human transcriptome across tissues and individuals. *Science.* 2015 May  
678 8;348(6235):660–5.
- 679 29. Di Tommaso P, Chatzou M, Floden EW, Barja PP, Palumbo E, Notredame C.  
680 Nextflow enables reproducible computational workflows. *Nat Biotechnol.* 2017 Apr  
681 11;35:316–9.
- 682 30. Laurie S, Fernandez-Callejo M, Marco-Sola S, Trotta J, Camps J, Chacón A, et al.  
683 From Wet-Lab to Variations: Concordance and Speed of Bioinformatics Pipelines  
684 for Whole Genome and Whole Exome Sequencing. *Hum Mutat.* 2016  
685 Dec;37(12):1263–71.
- 686 31. Baruzzo G, Hayer KE, Kim EJ, Di Camillo B, FitzGerald GA, Grant GR. Simulation-  
687 based comprehensive benchmarking of RNA-seq aligners. *Nat Methods.* 2017  
688 Feb;14(2):135–9.
- 689 32. Li H, Durbin R. Fast and accurate short read alignment with Burrows–Wheeler  
690 transform. *Bioinformatics.* 2009 Jul 15;25(14):1754–60.
- 691 33. Behm-Ansmant I, Kashima I, Rehwinkel J, Saulière J, Wittkopp N, Izaurralde E.  
692 mRNA quality control: an ancient machinery recognizes and degrades mRNAs with  
693 nonsense codons. *FEBS Lett.* 2007 Jun 19;581(15):2845–53.
- 694 34. Chess A. Mechanisms and consequences of widespread random monoallelic  
695 expression. *Nat Rev Genet.* 2012 May 15;13(6):421–8.
- 696 35. Meier JC, Kankowski S, Krestel H, Hetsch F. RNA Editing—Systemic Relevance and  
697 Clue to Disease Mechanisms? *Front Mol Neurosci* [Internet]. 2016 Nov 23 [cited  
698 2019 Apr 10];9. Available from:  
699 <https://www.ncbi.nlm.nih.gov/pmc/articles/PMC5120146/>
